# Supplementary material for: Pollinators and Other Flying Insects inside and outside the Fukushima Evacuation Zone
Source: PLoS One. 2015 Nov 11;10(11):e0140957. doi: 10.1371/journal.pone.0140957 (PMC4641662; doi:10.1371/journal.pone.0140957)
Supplement: S1 Data — (XLSX) [file pone.0140957.s001.xlsx]

## Sheet: S1_Data
S1 Data. Analyzed insect data in Fukushima
id	hinanlevel	PC1	PC2	PC3	PC4	x	y	Andrena_spp	Apidae	Apis_cerana	aprichnessmax	aprichnessmin	Araneae	Bombus_ardens	Bombus_diversus	butterfly	Calliphoridae	Camponotus_japonicus	Camponotus_obscuripes	Camponotus_quadrinotatus	Ceratina iwatai	Ceratina_flavipes	Ceratina_japonica	Coleoptera	Crematogaster_matsumurai	Diptera	Eucera_nipponensis	Eucera_spurcatipes	Formica_japonica	Formicidae	Halictidae	Halictus_aerarius	Hemiptera	Hylaeus_spp.	Hymenoptera	Lasioglossum_occidens	Lasioglossum_spp	Lasius_japonicus	Lepidoptera	Megachilidae	moth	Muscidae	Nomada_spp	Polistes_snelleni	Pristomyrmex_pungens	Queen_Camponotus_obscuripes	Sarcophagidae	Sphecodes_spp.	Syrphidae
s1	0	1.46028	-0.0180244	-0.295367	-1.52484	467894	4.17918e+06	0	19	3	3	3	6	0	1	3	22	0	0	0	0	0	15	204	0	659	0	0	3	6	35	0	21	1	362	0	35	1	73	1	70	70	0	3	0	0	94	0	62
s2	0	0.844937	-0.746273	0.0409832	-1.44481	464253	4.17467e+06	2	11	2	6	6	3	1	0	4	2	0	0	0	0	3	1	92	0	258	0	2	4	5	30	2	36	1	247	12	16	0	130	0	126	28	0	0	0	0	5	0	26
s3	0	1.38533	-0.218371	0.0453147	-1.30978	465878	4.17694e+06	0	5	3	2	2	2	0	0	1	1	0	0	0	2	0	0	101	0	274	0	0	56	96	31	0	61	1	222	0	30	34	26	0	25	73	0	1	0	0	1	1	31
s4	0	1.36943	-0.175593	-0.148382	0.38171	474968	4.18027e+06	1	0	0	0	0	0	0	0	0	5	0	1	1	0	0	0	68	0	423	0	0	8	36	31	0	6	0	356	7	24	26	32	0	32	22	0	0	0	0	20	0	47
s5	0	0.182204	0.824513	1.98582	0.803312	489425	4.18107e+06	0	7	0	3	3	3	3	0	0	5	0	0	0	0	0	2	73	0	423	2	0	13	71	10	0	70	0	222	0	10	1	29	0	29	69	0	0	53	0	28	0	62
s6	0	-1.27944	-0.682311	0.581339	-0.445948	492409	4.18107e+06	0	1	0	1	1	9	0	0	0	0	0	0	0	0	0	0	21	0	63	0	1	0	4	0	0	0	0	18	0	0	1	7	0	7	1	0	0	0	0	1	0	8
s7	0	-3.84134	2.93058	-1.99487	-0.634876	492534	4.18378e+06	0	3	0	2	2	3	0	0	1	3	0	0	0	0	0	0	143	0	831	1	0	130	430	34	3	101	0	725	0	31	276	77	0	76	10	0	0	22	0	22	0	213
s8	0	0.329685	-1.71024	-1.97608	0.0844805	461393	4.15422e+06	5	95	3	7	7	2	4	15	5	8	13	2	0	0	0	7	156	0	661	62	0	31	48	57	0	25	0	602	0	57	0	61	0	56	113	0	0	0	0	45	0	114
s9	0	1.26898	-1.12685	-1.54252	-0.145917	468861	4.15678e+06	0	2	0	2	2	4	0	0	3	5	9	1	0	0	0	1	97	0	1228	0	0	27	48	40	5	32	0	610	0	35	2	99	1	96	44	0	1	0	1	82	0	128
s10	0	0.662643	-0.861734	-1.03883	0.0534349	459182	4.16369e+06	0	8	0	4	4	17	0	4	7	13	0	0	0	0	2	0	178	0	647	1	0	17	22	31	0	54	0	495	15	16	0	113	0	106	29	1	0	0	0	31	0	65
s11	0	1.29715	0.573153	-0.106597	0.161169	459388	4.16076e+06	0	3	0	1	1	4	0	3	0	2	0	0	0	0	0	0	57	176	165	0	0	9	190	9	0	21	0	256	1	8	0	57	0	57	18	0	0	1	0	3	0	4
s12	0	1.80848	-0.352713	-0.570333	-0.238606	464360	4.15932e+06	0	8	1	2	2	5	0	0	51	6	0	0	0	0	7	0	305	0	959	0	0	19	85	42	1	70	0	913	29	11	66	184	0	133	39	0	0	0	0	53	1	92
s15	2	3.42943	1.10926	-0.100948	0.662786	473325	4.17161e+06	0	1	0	1	1	6	0	0	0	0	2	0	0	0	1	0	33	0	46	0	0	4	24	3	0	15	0	50	1	2	2	10	0	10	6	0	0	0	0	0	0	3
s16	2	0.0200418	-1.4486	-1.21398	-0.0785835	475495	4.16809e+06	3	51	2	5	5	20	1	1	2	3	0	0	0	0	46	1	314	0	951	0	0	58	81	44	3	114	6	934	13	28	17	79	1	77	36	0	0	0	0	21	0	147
s17	2	1.85602	0.204641	0.241324	-0.717778	476897	4.17003e+06	0	16	0	5	5	6	3	1	5	9	6	1	0	0	1	0	223	0	425	10	0	2	22	14	2	26	0	331	0	11	8	50	0	45	10	0	0	0	0	27	1	80
s18	2	-0.266855	-1.61604	-0.939608	-0.180805	477785	4.17234e+06	0	12	2	5	4	11	1	0	0	4	30	0	0	1	7	0	192	5	617	0	0	68	136	28	1	63	1	641	5	22	26	76	0	76	155	0	0	0	0	49	0	35
s22	1	-0.108192	-1.01539	0.35761	-0.0205032	495335	4.15876e+06	0	3	0	2	2	0	0	0	0	11	0	0	0	0	0	0	49	0	261	2	0	0	12	11	0	27	0	84	4	7	0	29	0	29	10	1	1	0	0	57	0	20
s23	1	-0.00575935	-0.722797	-1.05163	-0.0112409	496487	4.15651e+06	1	0	0	0	0	0	0	0	1	7	5	0	0	0	0	0	246	0	218	0	0	20	29	9	0	8	0	135	0	9	0	11	0	10	16	0	0	3	0	19	0	37
s24	1	-3.17085	-0.000414065	0.762608	-0.0272226	498670	4.15731e+06	0	0	0	0	0	11	0	0	1	0	0	0	0	0	0	0	55	0	190	0	0	4	31	2	0	13	0	111	0	2	17	12	0	11	13	0	0	0	0	3	0	44
s25	0	-1.94762	-1.42627	-0.727535	-0.283521	494187	4.16526e+06	0	0	0	0	0	1	0	0	0	0	0	0	0	0	0	0	220	0	29	0	0	5	7	2	0	8	0	24	0	2	0	13	0	13	3	0	0	0	0	1	0	1
s26	0	-2.49959	-1.77247	1.71522	0.061033	494262	4.168e+06	0	1	0	1	1	0	0	0	0	0	0	0	0	0	0	0	104	0	45	0	1	25	28	2	0	3	0	46	1	1	3	2	0	2	18	0	0	0	0	4	0	1
s27	0	-4.01419	3.46118	-2.30335	-0.555787	495681	4.16504e+06	0	6	0	5	5	1	1	0	0	3	0	1	0	0	1	0	38	0	695	0	1	32	41	42	0	35	0	235	13	29	0	101	0	101	14	2	0	0	0	5	0	163
s28	0	-1.86335	-0.794095	1.71897	0.166141	497372	4.16211e+06	0	1	0	1	1	3	0	0	1	3	0	0	0	0	0	0	47	0	298	0	0	2	44	1	0	23	0	135	0	1	36	11	0	10	6	0	0	0	1	18	0	32
s29	0	-1.50183	-1.54528	1.16631	-0.263997	498966	4.16716e+06	0	1	0	1	1	1	0	0	1	15	0	0	0	0	0	0	151	0	833	0	0	3	20	4	0	30	0	338	0	4	10	39	0	38	121	0	1	0	0	31	0	59
s30	0	-2.922	-1.1998	1.8595	0.358272	493753	4.17506e+06	0	0	0	0	0	0	0	0	0	1	0	0	0	0	0	0	33	0	241	0	0	30	41	7	0	10	0	130	0	5	0	28	1	28	11	0	2	0	0	27	2	49
s31	1	-4.0479	2.28369	-0.0538316	0.123326	499357	4.14973e+06	0	1	0	1	1	8	0	0	1	4	0	0	0	0	1	0	183	0	605	0	0	7	16	70	0	103	1	474	0	70	0	34	0	33	76	0	4	0	2	57	0	121
s32	2	-2.27288	-0.874454	1.82326	1.00937	495993	4.15102e+06	0	2	0	2	2	88	0	0	0	18	7	0	0	0	1	0	197	0	126	0	1	28	48	1	0	5	0	164	0	1	1	46	0	46	3	0	0	0	0	24	0	4
s33	2	-1.11474	-0.689087	1.32119	1.55954	496164	4.14775e+06	0	1	0	1	1	1	0	0	3	42	0	0	0	0	0	0	173	0	269	0	0	1	5	21	0	8	0	286	0	21	1	14	0	11	2	1	0	0	0	38	0	14
s34	2	-4.24473	1.90606	0.727814	0.405634	498203	4.14957e+06	2	9	0	6	6	6	1	1	0	1	0	0	3	2	3	0	90	0	96	1	0	2	28	7	0	124	0	207	3	4	6	17	0	17	4	1	0	0	0	8	0	19
s35	3	1.29929	0.0180841	-0.439422	-0.240321	478406	4.15715e+06	0	8	2	3	3	3	0	0	0	2	9	0	0	0	5	0	211	1	247	0	0	89	109	8	1	17	0	428	2	5	6	77	0	77	18	1	0	0	1	14	0	9
s36	3	3.29295	1.5395	0.274384	1.709	482518	4.15776e+06	23	25	0	3	3	0	0	0	4	10	0	2	0	0	22	1	272	0	420	0	0	273	279	20	1	23	0	730	1	18	0	142	2	138	17	2	0	0	0	67	0	34
s37	3	2.33817	0.235434	-0.405861	-0.151956	478328	4.16101e+06	2	10	0	4	4	13	0	2	5	2	0	1	8	0	5	1	197	0	361	2	0	86	157	13	0	30	3	487	0	12	60	31	0	26	29	0	0	0	0	29	1	97
s38	3	3.99839	2.60807	2.11825	-3.73926	492130	4.15093e+06	2	7	0	5	5	4	1	0	1	49	0	2	0	0	2	2	417	0	1334	1	0	2	30	26	0	116	0	1100	0	20	22	76	0	75	92	1	2	0	0	74	6	64
s39	3	2.20889	-0.462032	-1.23599	0.767108	474142	4.15705e+06	2	34	0	5	5	14	0	0	5	4	34	3	0	1	26	5	265	0	505	1	0	84	128	22	1	49	0	563	0	21	7	121	0	116	20	1	0	0	0	7	0	32
s40	3	3.33518	1.64548	0.68699	0.592523	487807	4.15498e+06	1	4	0	3	3	9	0	2	2	9	9	1	0	0	1	0	297	0	646	1	0	308	336	19	0	72	3	700	7	12	0	146	0	144	13	0	1	0	1	17	0	109
s45	0	-1.45382	0.323033	-1.60247	0.0741967	468591	4.14374e+06	2	24	2	8	8	8	4	0	6	2	0	1	0	1	6	7	127	2	449	0	0	102	116	38	0	89	2	585	9	29	11	132	0	126	27	1	1	0	0	12	0	61
s46	0	-0.821408	-1.44512	-0.578459	0.551095	461987	4.13906e+06	1	16	0	5	5	1	1	0	10	16	0	0	0	0	11	0	105	0	662	2	1	33	43	57	1	37	0	413	3	52	7	152	0	142	28	0	1	0	0	28	1	68
s47	0	0.859099	-1.41755	-1.57314	-0.0991096	468868	4.152e+06	0	4	0	2	2	11	0	0	2	4	9	0	8	0	0	0	146	8	563	0	1	4	64	5	0	33	0	353	0	5	18	67	0	65	97	0	0	1	1	22	0	27
s49	1	-1.54033	0.384116	-0.442523	-0.0443461	499869	4.12443e+06	1	2	0	2	2	2	0	0	1	12	0	1	0	0	0	0	50	0	650	0	0	56	76	16	0	22	1	344	5	11	0	36	0	35	23	1	0	0	0	54	0	77
s51	0	3.10243	1.96597	0.341216	4.09282	472294	4.11088e+06	1	17	0	5	5	9	0	4	7	7	0	0	0	0	10	1	298	0	661	1	0	132	200	70	1	72	1	740	4	65	54	123	1	116	14	0	0	12	0	33	0	76
s52	0	0.854237	-1.61638	-1.23947	0.428982	474123	4.12804e+06	0	0	0	0	0	2	0	0	0	9	2	2	0	0	0	0	160	0	377	0	0	15	21	8	0	2	0	211	0	8	2	9	0	9	5	0	0	0	0	35	0	19
s53	0	1.19161	0.888075	0.437062	0.838712	481820	4.10085e+06	0	2	0	1	1	10	0	0	0	1	0	2	0	0	2	0	97	0	67	0	0	2	18	1	0	12	0	72	0	1	1	17	0	17	2	0	1	0	0	3	0	15
s54	0	-0.242185	-0.613564	0.828401	0.0965043	491407	4.10755e+06	0	1	0	1	1	2	0	0	0	4	17	0	4	0	0	0	27	15	86	0	0	31	84	7	1	6	0	164	1	5	13	4	0	4	3	0	0	0	0	7	0	3
s55	0	-1.96847	1.80504	-0.287666	-0.131581	491937	4.09442e+06	0	4	0	1	1	0	4	0	0	4	0	0	0	0	0	0	42	0	139	0	0	1	6	30	0	9	0	113	0	30	0	2	1	2	4	0	1	0	0	4	0	16
s56	0	0.284878	-0.102028	1.28272	-1.03883	493945	4.10243e+06	0	1	0	1	1	2	1	0	0	0	0	0	1	0	0	0	49	2	269	0	0	0	14	3	0	22	0	118	0	3	2	24	0	24	1	0	0	0	0	2	0	12
s57	0	0.339013	-0.831008	0.976708	-1.02379	495951	4.11447e+06	1	0	0	0	0	0	0	0	0	0	0	4	0	0	0	0	67	0	32	0	0	0	6	1	0	8	0	39	0	1	0	8	0	8	1	0	0	0	0	1	0	0
s58	0	2.10875	0.778626	0.575867	-0.627741	478059	4.11771e+06	0	8	0	2	2	2	0	0	1	0	0	0	0	0	6	0	34	0	78	0	0	0	0	0	0	28	0	70	0	0	0	13	0	12	0	0	0	0	0	1	0	4
[truncated: 6 more columns]
