# Supplementary material for: Pollinators and Other Flying Insects inside and outside the Fukushima Evacuation Zone
Source: PLoS One. 2015 Nov 11;10(11):e0140957. doi: 10.1371/journal.pone.0140957 (PMC4641662; doi:10.1371/journal.pone.0140957)
Supplement: S1 Table — (XLSX) [file pone.0140957.s003.xlsx]

## Sheet: S1_Table
Yoshioka et al. Pollinators and other flying insects inside and outside the Fukushima evacuation zone.
S1 Table Mean±S.D. number of individuals of each sampled taxnomic and caste group*
	Mean	S.D.
Araneae	6.65957	13.0572
Hemiptera	37.4255	33.8801
Coleoptera	142.638	95.6494
Hymenoptera	352.83	270.693
Formicidae	71.0851	89.3493
Total winged ants (queens and males)	4.68085	4.68627
Total workers	66.4043	89.2531
Crematogaster matsumurai	4.44681	25.6945
Crematogaster teranishii	0.021277	0.145865
Myrmica kotokui	0.021277	0.145865
Pheidole fervida	0.085106	0.408059
Pristomyrmex pungens	1.95745	8.42862
Temnothorax arimensis	0	0
Temnothorax congruus	0.085106	0.458247
Tetramorium tsushimae	0.297872	0.719749
Vollenhovia emeryi	0.085106	0.282057
Myrmicinae sp. (queen)	0.021277	0.145865
Myrmicinae spp. (male)	0.085106	0.282057
Dolichoderus sibiricus	0.06383	0.437595
Camponotus japonicus	3.23404	7.31946
Camponotus japonicus (queen)	0.191489	0.680099
Camponotus obscuripes	0.531915	0.929026
Camponotus obscuripes (queen)	0.148936	0.415918
Camponotus itoi	0.021277	0.145865
Camponotus nipponensis	0.021277	0.145865
Camponotus quadrinotatus	0.531915	1.75513
Camponotus kiusiuensis	0.106383	0.598333
Camponotus sp. (queen)	0.021277	0.145865
Formica japonica	38.8511	64.0401
Lasius flavus	0.021277	0.145865
Lasius nipponensis	0.021277	0.145865
Lasius spathepus	0.212766	1.31771
Lasius japonicus (male)	0.148936	0.779596
Lasius japonicus	15.6808	42.0497
Lasius spp. (queen)	0.021277	0.145865
Paratrechina flavipes	0.042553	0.29173
Paratrechina sakurae	0.06383	0.323315
The other queens (Formicinae spp.)	0.106383	0.598333
The other males (Formicinae spp.)	3.93617	4.63167
Vespidae	0.829787	1.47912
Discoelius japonicus	0.021277	0.145865
Euodynerus nipanicus nipanicus	0.021277	0.145865
Stenodynerus chinensis simillimus	0.021277	0.145865
Parapolybia indica indica	0.085106	0.282057
Polistes chinensis antennalis	0.021277	0.145865
Polistes jokahamae jokahamae	0.021277	0.145865
Polistes nipponensis	0.106383	0.598333
Polistes snelleni	0.425532	0.853247
Vespa simillima	0.085106	0.282057
Vespula flaviceps	0.021277	0.145865
Hylaeus spp.	0.446809	1.09958
Andrena spp.	1.06383	3.42881
Halictidae	20.4681	19.0421
Halictus aerarius	0.489362	1.01879
Lasioglossum occidens	2.89362	5.59982
Lasioglossum spp.	16.8085	17.3339
Sphecodes spp.	0.276596	0.948732
Megachilidae	0.170213	0.433346
Coelioxys hiroba	0.042553	0.29173
Megachile tsurugensis	0.085106	0.282057
Megachile spp.	0.021277	0.145865
Apidae	9.23404	16.2176
Ceratina iwatai	0.148936	0.465259
Ceratina flavipes	3.59574	8.26901
Ceratina japonica	0.93617	2.64085
Ceratina sp.	0.021277	0.145865
Xylocopa appendiculata	0.361702	0.704814
Nomada spp.	0.276596	0.539812
Eucera spurcatipes	0.170213	0.433346
Eucera nipponensis	1.85106	9.09605
Bombus hypocrita	0.042553	0.20403
Bombus diversus	0.723404	2.34708
Bombus ardens	0.553191	1.13843
Apis cerana	0.425532	0.926534
Apis mellifera	0.12766	0.536374
Diptera	427.277	318.165
Tabanidae	2.25532	4.00797
Syrphidae	51.1489	48.2669
Muscidae	30.0851	36.27
Calliphoridae	6.97872	9.74789
Sarcophagidae	25.1915	23.7163
Lepidoptera	56.1702	48.8037
Butterflies	2.85106	7.56703
Moths	53.3192	44.914
