# Supplementary material for: Pollinators and Other Flying Insects inside and outside the Fukushima Evacuation Zone
Source: PLoS One. 2015 Nov 11;10(11):e0140957. doi: 10.1371/journal.pone.0140957 (PMC4641662; doi:10.1371/journal.pone.0140957)
Supplement: S2 Table — (XLSX) [file pone.0140957.s004.xlsx]

## Sheet: S2_Table
Yoshioka et al. Pollinators and other flying insects inside and outside the Fukushima evacuation zone.
S2 Table. Mean (upper row) ±S.D. (lower row) values of coefficients in the statistical Bayesian model
(see Materials and Methods and S5 Panel for detail )
	a0	a1	a2	b0	b1	b2	b3	b4	sigma	phi
Araneae	0.814228	0.319345	0.754884	1.10588	0.0250087	-0.0126696	-0.190294	0.145162	1.24204	0.0049967
	0.275655	0.224462	0.196506	0.580873	0.226912	0.215142	0.21178	0.203858	0.210917	0.00285417
Hemiptera	3.0675	0.257718	0.587177	0.390685	0.0859129	0.404127	-0.259015	-0.109416	0.983581	0.00507815
	0.187175	0.200812	0.239313	0.441688	0.16014	0.155099	0.151418	0.149354	0.127945	0.00278425
Coleoptera	4.47213	0.267221	0.607288	0.973894	0.139612	-0.0918675	-0.196001	0.0429289	0.676506	0.00536933
	0.128223	0.196628	0.218185	0.324274	0.114985	0.106657	0.103345	0.100144	0.0828781	0.00265929
Hymenoptera	5.30255	0.318364	0.667152	0.798664	0.162456	0.146722	-0.378333	0.0525911	0.884022	0.0049763
	0.158365	0.232717	0.236016	0.400128	0.153441	0.135253	0.129216	0.127729	0.103012	0.00284498
Formicidae	3.34466	0.185879	0.4277	1.28572	0.0165642	0.146503	-0.359018	0.398498	1.11643	0.00523355
	0.206846	0.169595	0.238948	0.6203	0.204054	0.175709	0.167723	0.169499	0.144268	0.00271684
Total winged ants (queens and males)	0.712086	0.474708	0.766424	1.02654	-0.339956	0.139022	0.21044	-0.0434821	1.07347	0.0051231
	0.272217	0.23864	0.181707	0.52745	0.196794	0.193426	0.185978	0.198664	0.203729	0.00280951
Total workers	3.06397	0.173977	0.4203	1.48972	0.023709	0.117866	-0.444434	0.400932	1.3432	0.00531301
	0.249285	0.168137	0.24612	0.789502	0.250692	0.214768	0.205291	0.20348	0.176538	0.00272927
Crematogaster matsumurai	-12.5766	0.334459	0.651317	-2.67382	1.30381	-2.51168	-1.7916	-1.35238	10.6012	0.00486646
	4.79416	0.236482	0.239917	5.64604	3.18781	3.00373	2.68417	3.10834	4.20195	0.00293311
Pristomyrmex pungens	-10.339	0.269145	0.669405	-9.75748	0.58403	2.03807	-1.52078	2.70697	8.17246	0.00512741
	4.68674	0.212946	0.234322	6.33489	2.42641	2.21406	2.02479	2.565	3.48612	0.00290358
Tetramorium tsushimae	-5.71479	0.328862	0.650805	1.10654	-0.557224	-0.104378	-1.07287	1.24868	3.91596	0.00517835
	2.8989	0.237823	0.239372	2.6905	1.19026	0.995303	1.17706	1.29272	2.19759	0.00277583
Camponotus japonicus	-7.1984	0.368099	0.730597	5.20117	3.26957	-4.75185	-0.394299	0.912441	4.09675	0.00522623
	2.57569	0.232021	0.193525	2.43628	2.22238	2.3529	1.43201	1.1955	1.37373	0.00274827
Camponotus obscuripes	-2.30753	0.305759	0.619657	0.391318	1.09375	0.285422	-0.904823	-0.310088	1.64937	0.00479612
	0.935209	0.22462	0.245931	1.27355	0.659444	0.471147	0.59474	0.390736	0.715349	0.00304453
Camponotus obscuripes (queen)	-9.13966	0.308983	0.605937	2.21003	-0.461507	-0.179224	-0.735672	0.266597	5.81684	0.00517195
	4.79991	0.22943	0.250104	4.37657	1.84989	1.71818	1.7001	1.86875	3.89168	0.00283383
Camponotus quadrinotatus	-13.4165	0.315213	0.644227	-0.170475	0.0171328	-0.622011	0.425903	-0.378737	10.4364	0.00522333
	4.9664	0.223221	0.235448	5.84017	2.58548	2.73167	2.63847	2.79283	4.31298	0.00282814
Formica japonica	1.93928	0.138551	0.325317	2.38428	-0.191975	-0.0435265	-0.808151	0.71751	1.51742	0.00520674
	0.306638	0.136547	0.209667	0.907865	0.280888	0.251477	0.235084	0.247918	0.226132	0.00280836
Lasius japonicus	0.331371	0.290713	0.643024	0.674194	0.150905	-0.0887313	-0.132911	-0.00183258	2.86039	0.00525095
	0.638226	0.223709	0.238284	1.40391	0.501886	0.489136	0.466373	0.441342	0.519629	0.00270191
Vespidae	-1.38797	0.28809	0.691363	-1.1796	0.257501	0.465087	0.409325	-0.388112	1.99738	0.0051665
	0.692407	0.221933	0.232287	1.56044	0.500563	0.465148	0.465156	0.400364	0.746786	0.00278717
Polistes snelleni	-1.97241	0.273414	0.682006	-1.39588	-0.173162	0.411688	0.390165	-0.650555	1.63693	0.00506796
	0.859803	0.216473	0.228778	1.64208	0.499131	0.46706	0.474785	0.476199	0.831136	0.0028758
Hylaeus spp.	-4.06328	0.371942	0.689414	1.79584	0.487551	0.288408	-1.20696	-0.0205667	2.65472	0.00472892
	1.60803	0.240708	0.221384	1.81526	0.752606	0.713121	0.881571	0.626382	1.33824	0.00294436
Andrena spp.	-2.56011	0.299294	0.611419	2.20325	0.516851	0.11701	-0.717449	0.148523	1.94153	0.00519796
	0.834826	0.216634	0.235068	1.27983	0.508862	0.492659	0.510172	0.383226	0.652889	0.00273402
Halictidae	2.40047	0.319221	0.63722	0.110263	0.18512	0.313254	-0.682908	0.0617469	1.10077	0.00506027
	0.221975	0.228848	0.237088	0.507211	0.186493	0.178956	0.177658	0.166747	0.162634	0.0028254
Halictus aerarius	-2.99899	0.304832	0.650392	0.594969	0.674754	-0.0948107	-1.45182	0.128591	2.00651	0.00481556
	1.28487	0.229834	0.238064	1.41213	0.711774	0.517437	0.768327	0.536535	0.978348	0.0029372
Lasioglossum occidens	-1.67285	0.325424	0.646259	0.489332	0.121562	0.0928402	-1.15091	0.667276	3.0034	0.00544319
	0.887802	0.22964	0.238302	1.60835	0.624518	0.566598	0.637626	0.621512	0.776869	0.00268454
Lasioglossum spp.	2.20184	0.311103	0.63929	0.076013	0.163512	0.318726	-0.661831	0.100447	1.07788	0.00516365
	0.216143	0.226809	0.241475	0.509482	0.18653	0.172292	0.174035	0.163209	0.155482	0.00276552
Sphecodes spp.	-7.59538	0.306464	0.633997	1.21638	2.27743	-2.85898	1.82028	-1.66254	3.64551	0.00509332
	3.91771	0.228439	0.241604	3.02025	2.4505	2.5471	1.68698	1.54375	2.53826	0.00285412
Megachilidae	-6.32835	0.328929	0.653003	-1.06265	0.677747	-0.0932736	-0.363707	1.22543	4.23739	0.00502952
	3.97356	0.234403	0.239589	3.51312	1.48765	1.32014	1.34873	1.43561	3.44454	0.00288208
Apidae	1.00791	0.253665	0.671465	0.884126	0.446427	0.157593	-0.675565	0.0453669	1.29984	0.00516993
	0.280267	0.208238	0.228726	0.630291	0.239554	0.216186	0.223158	0.205014	0.206815	0.00280749
Ceratina iwatai	-13.1667	0.305249	0.670568	4.69767	-1.96436	-0.892571	-2.4428	-1.11238	7.2026	0.00517779
	5.15459	0.222565	0.229132	4.83918	2.23559	2.13409	2.27674	2.65416	3.69357	0.00288186
Ceratina flavipes	-1.7663	0.254644	0.720114	2.71728	0.583824	0.350184	-0.93659	0.442378	2.2114	0.00494983
	0.722638	0.199968	0.199515	1.14576	0.480797	0.450498	0.479747	0.378199	0.553567	0.00289218
Ceratina japonica	-4.85845	0.322961	0.653407	-0.691741	2.84719	0.253032	-1.47767	-0.287354	3.89138	0.00518725
	2.18386	0.233401	0.238727	2.49466	1.58891	1.16068	1.14417	0.710798	1.58868	0.00281566
Xylocopa appendiculata	-1.48402	0.234958	0.65531	-8.06689	-0.225786	0.0838733	-0.56161	0.324769	1.1223	0.00486946
	0.685793	0.183439	0.230523	4.8782	0.528593	0.390247	0.39892	0.485717	0.754305	0.00294906
Nomada spp.	-3.24499	0.350614	0.615224	2.71264	-0.361105	0.472546	-0.535359	0.079301	0.849836	0.00500907
	1.09356	0.220397	0.221279	1.34104	0.466291	0.386378	0.434073	0.384062	0.751897	0.00293872
Eucera spurcatipes	-6.24435	0.321245	0.597711	-3.0726	-2.65217	-1.86767	-0.551027	-1.54121	3.11878	0.00521001
	3.50527	0.23006	0.254289	4.4685	2.03802	1.50436	1.06233	1.86649	2.41462	0.00274827
Eucera nipponensis	-4.43516	0.325357	0.661527	1.72385	0.72126	0.496186	-0.717364	0.284214	3.86799	0.00536274
	1.77537	0.228016	0.231734	2.35434	0.911742	0.84933	0.865758	0.694927	1.35747	0.00274638
Bombus diversus	-5.90654	0.313323	0.654165	1.01672	1.49796	0.444913	-1.60157	0.833772	4.32912	0.00503129
	2.68936	0.23138	0.237935	2.68237	1.24895	1.18656	1.37405	1.02199	2.01571	0.00291405
Bombus ardens	-3.19874	0.301442	0.602245	-0.439701	-0.527822	0.228669	-0.432191	-1.09004	2.89828	0.00485583
	1.47568	0.230136	0.259507	2.40613	0.871543	0.684593	0.642009	0.908309	1.20483	0.00298568
Apis cerana	-7.11297	0.312102	0.647136	1.36552	0.514925	-2.0956	-3.20956	-3.68248	2.676	0.00470532
	3.15774	0.226773	0.237579	2.46388	1.47558	1.35078	1.72019	1.86662	1.58161	0.00299222
Apidae richness (max)	0.562251	0.2453	0.704432	0.597725	0.0973036	0.128855	-0.347616	-0.0371043	0.479302	0.00500732
	0.184284	0.200423	0.211847	0.346102	0.141926	0.122083	0.133547	0.116826	0.200123	0.00289854
Apidae richness (min)	0.567903	0.251294	0.692741	0.567532	0.106459	0.136562	-0.341495	-0.0348214	0.480613	0.00502231
	0.188334	0.202057	0.214021	0.352858	0.139489	0.125047	0.130403	0.117551	0.198664	0.00291581
Diptera	5.6041	0.318874	0.624033	0.330894	0.125018	0.104513	-0.369961	-0.068095	0.976294	0.00535333
	0.187156	0.227386	0.245589	0.447982	0.158154	0.153874	0.143756	0.141865	0.11453	0.00268759
Tabanidae	-1.03177	0.303768	0.549335	1.16549	1.08716	-0.883871	-0.0405584	0.126892	1.74357	0.00484321
	0.533454	0.218341	0.257098	1.06744	0.519386	0.511747	0.374513	0.308406	0.407665	0.00293838
Syrphidae	3.26029	0.328955	0.636951	0.305304	-0.0370325	0.338048	-0.535577	-0.00641965	1.25838	0.0051682
	0.238767	0.232482	0.240036	0.579315	0.211035	0.19754	0.19191	0.192009	0.166665	0.00281234
Muscidae	2.58113	0.324123	0.615716	0.388092	0.14179	-0.163415	-0.431298	-0.251361	1.33712	0.00539071
	0.256663	0.233181	0.246851	0.622185	0.222797	0.215088	0.207861	0.201956	0.179077	0.00267506
Calliphoridae	1.05076	0.354003	0.666513	0.717056	0.208204	-0.0349958	-0.0708188	0.0699532	1.33237	0.0051359
	0.290115	0.236822	0.23224	0.639712	0.241009	0.221046	0.222721	0.207941	0.226065	0.00281917
Sarcophagidae	2.38899	0.362347	0.639713	0.883641	0.021661	-0.138434	-0.191613	0.141853	1.3638	0.00534806
	0.263345	0.235714	0.231833	0.632535	0.233488	0.208654	0.21131	0.207871	0.18829	0.0027257
Lepidoptera	3.43686	0.269575	0.598625	0.51311	0.269168	0.126418	-0.471395	0.0398004	0.987792	0.00507862
	0.183722	0.209531	0.247003	0.462668	0.16599	0.154316	0.156619	0.148504	0.126108	0.00283217
Butterflies	-0.357495	0.317275	0.641127	0.0411616	0.764832	-0.131925	-0.701898	0.196055	1.50899	0.0051477
	0.421893	0.227319	0.235247	0.833286	0.339233	0.316536	0.321003	0.263049	0.338556	0.00274837
Moths	3.40087	0.269238	0.587348	0.505338	0.267434	0.139822	-0.457	0.0389887	0.986604	0.00511133
	0.182036	0.217273	0.251162	0.470518	0.169794	0.153378	0.151655	0.145315	0.12603	0.002785
